# Supplementary material for: Compartmentalized gene regulatory network of the pathogenic fungus Fusarium graminearum
Source: PubMed Central journal article supplement (PMC5069591; doi:10.1111/nph.13912), 2016-03-14
Supplement: NPH-211-527-s001.pdf [file NPH-211-527-s001.pdf]

## **New Phytologist Supporting Information Figs S1–S8 and Tables S1–S8**

Article title: Compartmentalized gene regulatory network of the pathogenic fungus *Fusarium graminearum*

Authors: Li Guo, Guoyi Zhao, Jin-Rong Xu, H. Corby Kistler, Lixin Gao and Li-Jun Ma

Article acceptance date: 25 January 2016

The following Supporting Information is available for this article:

**Fig. S1** Scatterplot matrix of three biological replicates and associated Pearson correlation coefficients ( $r$ ) for each condition/biological state transcriptomically profiled in this study using the Affymetrix Fungal Multigenome ExonChip.

**Fig. S2** Bayesian network score distribution for the top 300 regulators in the *Fusarium graminearum* GRN.

**Fig. S3** Visualization of the *Fusarium graminearum* GRN featuring the top 120 regulators, including TFs and SPs, represented by red and green nodes, respectively.

**Fig. S4** Gene–phenotype networks depicting the association of known phenotypes (red nodes) with inferred SP (blue nodes) and TF regulators (green nodes).

**Fig. S5** Regulatory modules are differentially regulated in response to various biological conditions.

**Fig. S6** Heatmap of hierarchical co-clustering of biological conditions (rows) and 120 regulators (columns).

**Fig. S7** Biased regulatory networks for core regulators of *Fusarium graminearum*.

**Fig. S8** Shared networks by the *Fusarium graminearum* GRN and protein–protein interaction network (FPPI).

**Table S1** Summary of conditions on which the transcriptomic data are based for *Fusarium graminearum* gene regulatory network inference in this study

**Table S2** Input gene expression data matrix (separate Excel file)

**Table S3** Spreadsheets containing lists of candidate regulators, inferred 120 top regulators, the full GRN, core genome GRN, and *Fusarium graminearum*-specific GRN (separate Excel file)

**Table S4** Summary of signaling proteins identified as inferred regulators in this network

**Table S5** List of 75 inferred transcription factor regulators and the most enriched binding site for target genes (separate Excel file)

**Table S6** Gene lists of eight regulatory modules (A–H) and complete FunCat analysis results (separate Excel file)

**Table S7** Gene regulatory networks for candidate effector genes (separate Excel file)

**Table S8** *Fusarium graminearum* GRN and FPPI shared networks (separate Excel file)

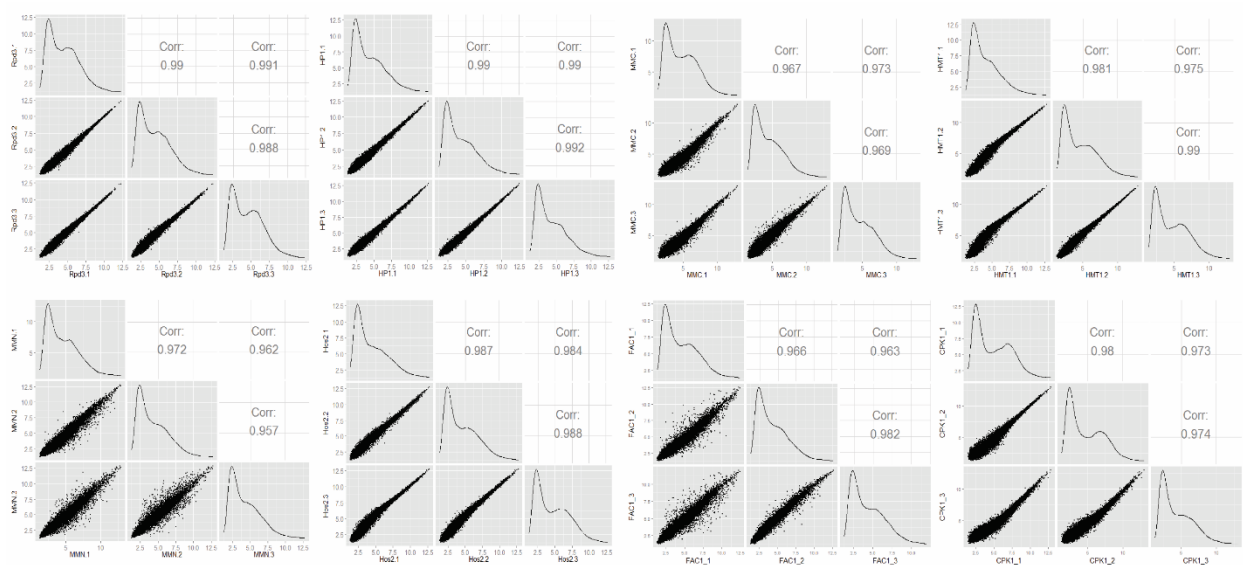

**Fig. S1** Scatterplot matrix of three biological replicates and associated Pearson correlation coefficients ( $r$ ) for each condition/biological state transcriptomically profiled in this study using the Affymetrix Fungal Multigenome ExonChip. Conditions/biological states include: complete medium (CM), carbon starvation medium (MMC), nitrogen starvation medium (MMN), and the *HMT1*, *Hos2*, *Rpd3*, *HP1*, *CPK1*, and *FAC1* mutants. The x- and y-axis in each scatterplot represent expression values ( $\log_2$ -transformed). The scatterplot matrix (eight blocks) was created using the R package *GGally*. The Pearson correlation coefficient ( $r$ ) is listed for each scatter plot.

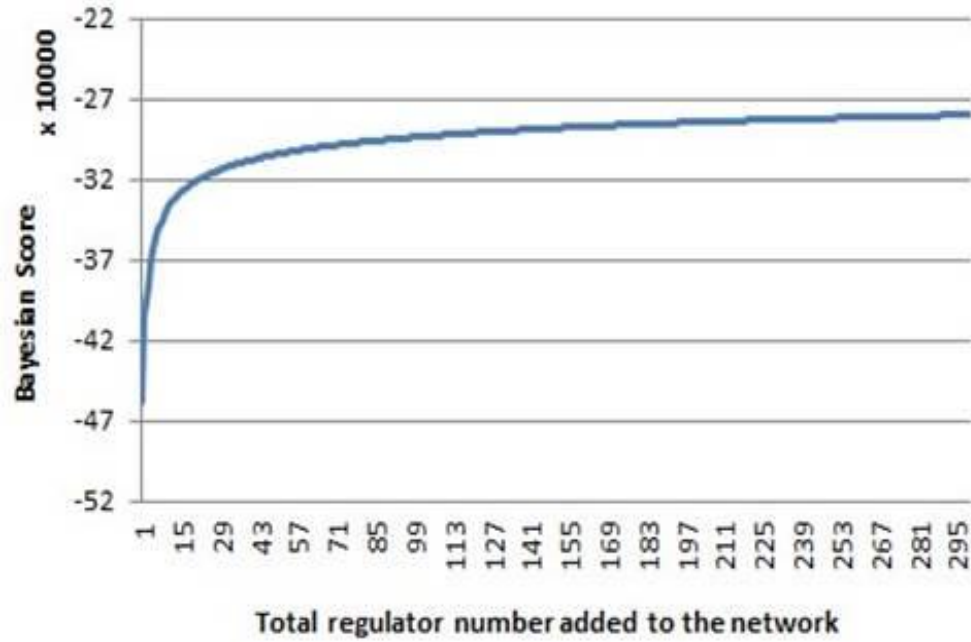

**Fig. S2** Bayesian network score (BNS) distribution for the top 300 regulators in the *Fusarium graminearum* gene regulatory network (GRN). X- and y-axis represent the accumulating number of inferred regulators and the corresponding BNS of the GRN.

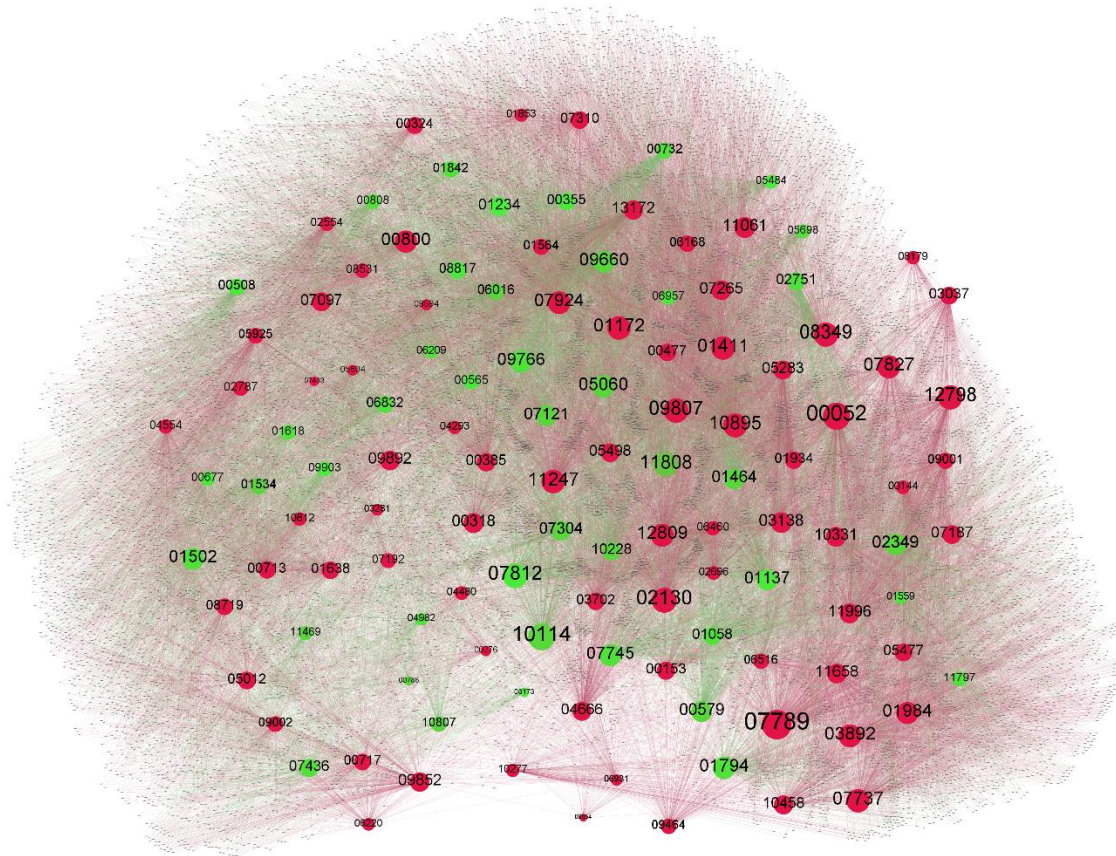

**Fig. S3** Visualization of the *Fusarium graminearum* GRN featuring the top 120 regulators, including transcription factors (TF) and signaling proteins (SP), represented by red and green nodes, respectively. Target genes are represented by grey nodes. For simplicity, prefixes (FGSG\_) of gene\_ID were omitted. Sizes of nodes are proportional to their out-degrees (target gene numbers).

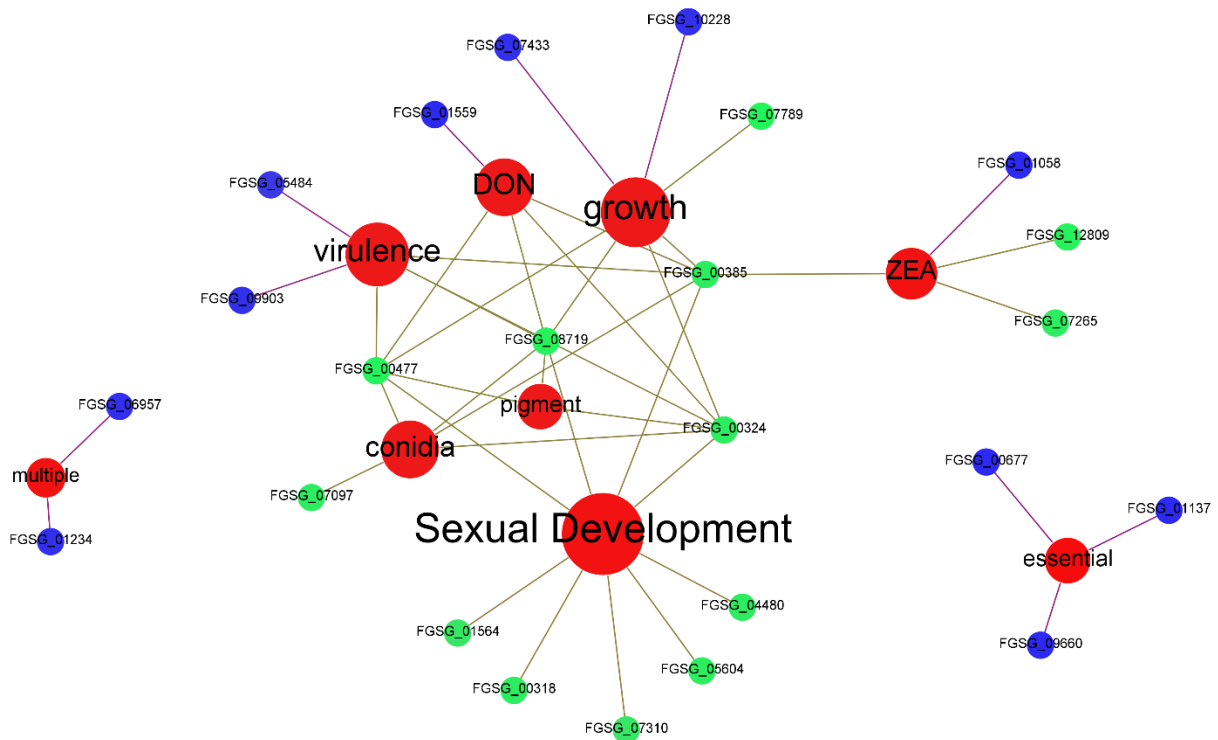

**Fig. S4** Gene–phenotype networks depicting the association of known phenotypes (red nodes) with inferred SP (blue nodes) and TF regulators (green nodes). Phenotype information is derived from FgTFPD (Son *et al.*, 2011), a previous kinome analysis (Wang *et al.*, 2011), and the PHI-base (Winnenburg *et al.*, 2008). Phenotypes include conidia (conidia germination), growth (vegetative growth on PDA or minimal media), sexual development (perithecium and ascospore development), deoxynivalenol production (DON), zearalenone production (ZEA), virulence (wheat head blight), multiple (pleiotropic), and essential (lethal mutation).

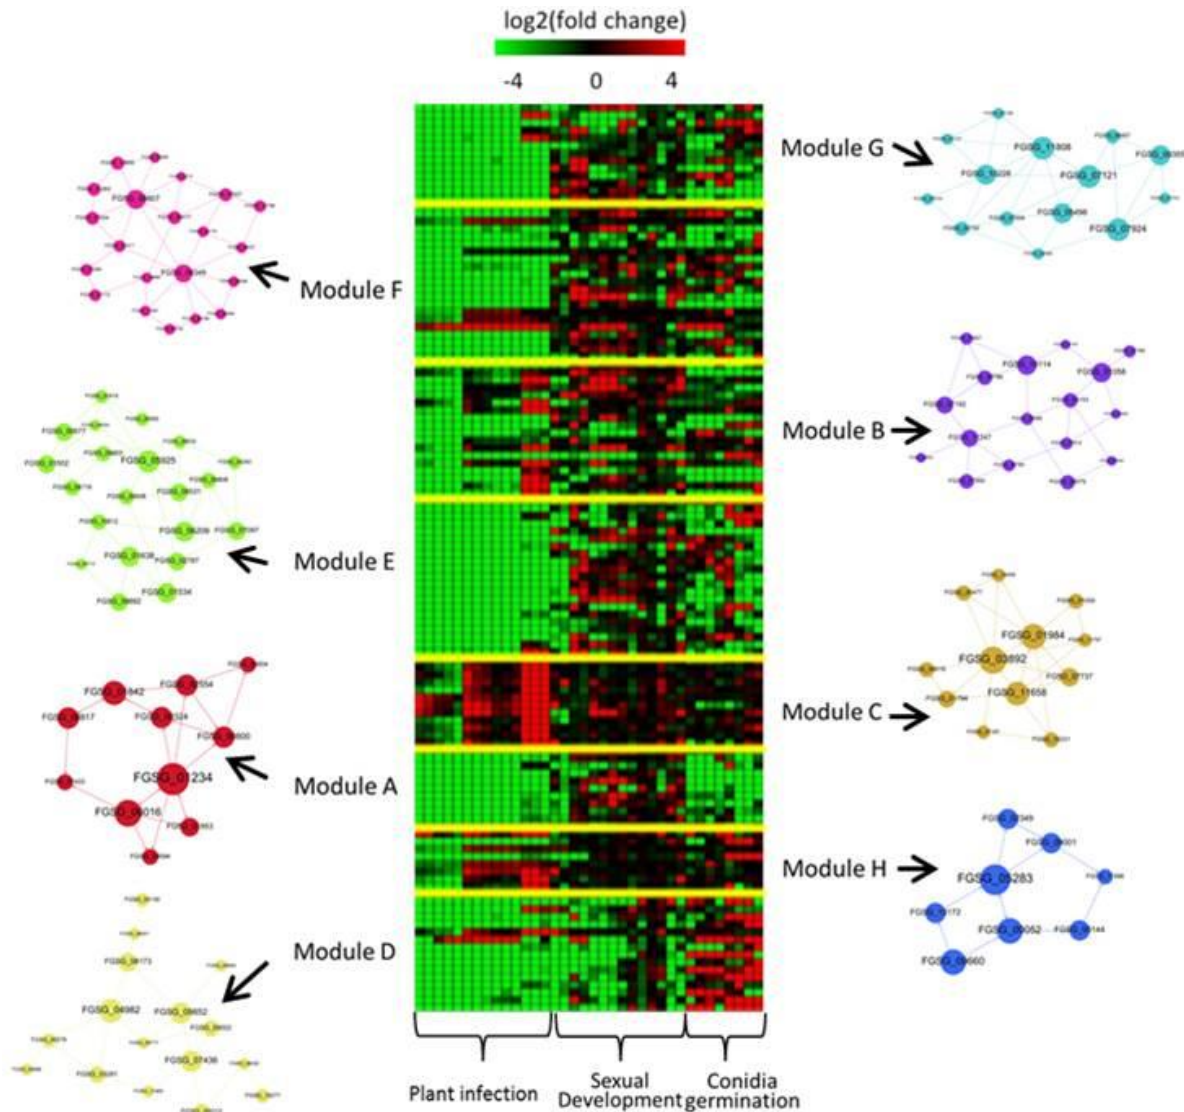

**Fig. S5** Regulatory modules are differentially regulated in response to various biological conditions. Gene expression of 120 regulators (rows) was clustered with hierarchical clustering and visualized in a heatmap. Color scale represents log<sub>2</sub>-transformed fold change from low (-4) to high (4). Green, downregulated; red, upregulated; black, no change. Biological conditions (columns) are divided into three categories: plant infection, sexual development, and conidia germination. Yellow lines in the heatmap are boundaries for different modules of regulators. Module A–H along with their respective subnetworks (pointed in arrows, extracted from Fig. 3) annotate each section of the heatmap. Color rules and node sizes are the same as in Fig. 3.

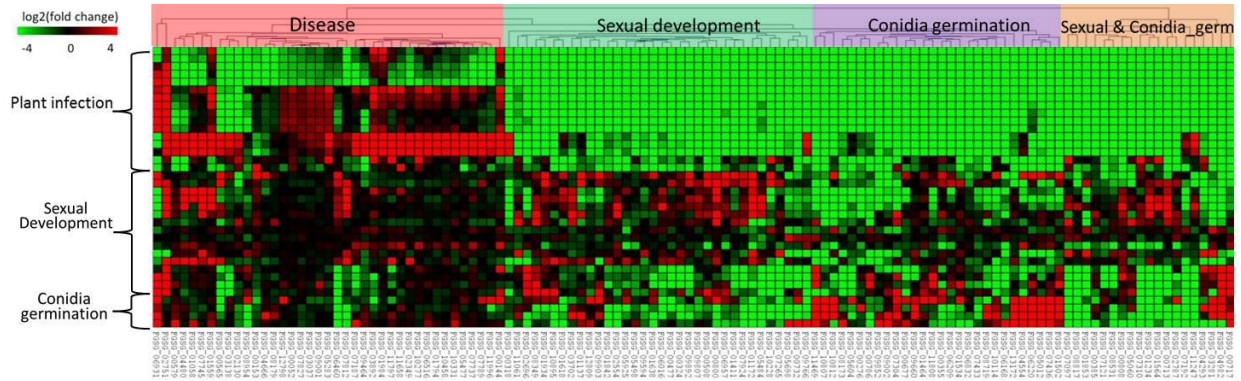

**Fig. S6** Heatmap of hierarchical co-clustering of biological conditions (rows) and 120 regulators (columns). Color scale represents log<sub>2</sub>-transformed fold change from low (-4) to high (4). Green, downregulated; red, upregulated; black, no change. Biological conditions are clustered into three categories: plant infection, sexual development, and conidia germination. Based on up- and downregulation of regulators in different biological condition categories, regulators are clustered into four major clusters: disease, sexual development, conidia germination, and sexual development and conidia germination.



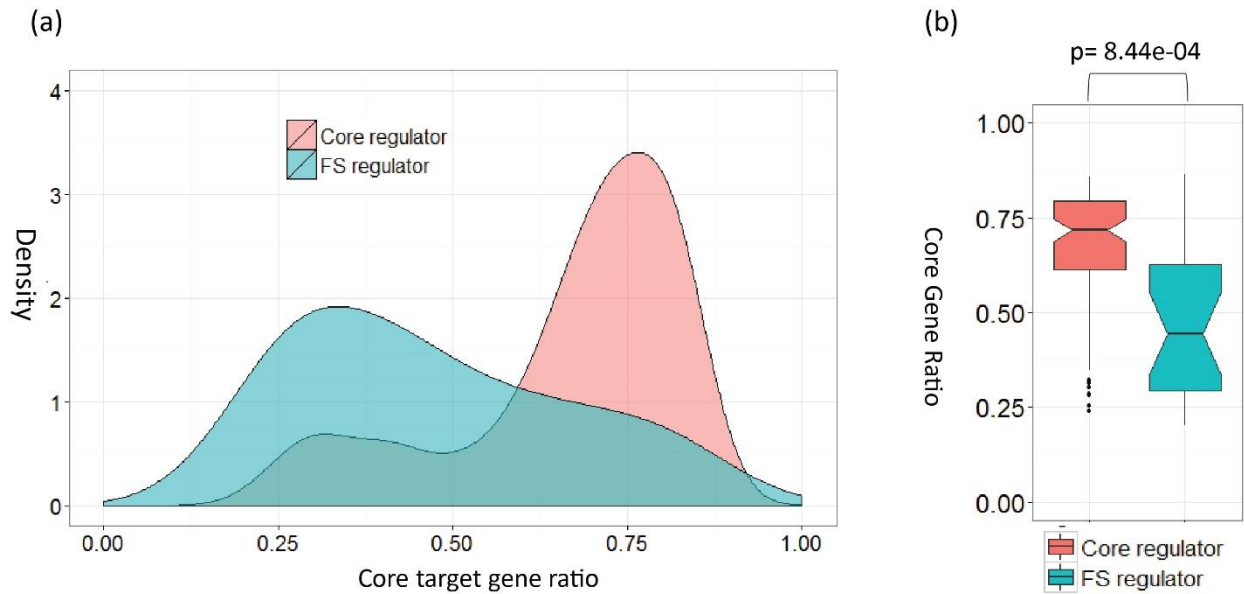

**Fig. S7** Biased regulatory networks for core regulators of *Fusarium graminearum*. (a) Kernel density curve of core target gene ratio distributions for 96 core and 24 *F. graminearum*-specific (FS) regulators in the *F. graminearum* GRN. Core target genes ratios measure the proportion of core genes amongst total target genes per regulator. (b) Notch boxplots summarizing core target gene ratio distributions for 96 core and 24 FS regulators, which are significantly different with a  $P$ -value of  $< 0.05$  (Student's  $t$ -test). The horizontal black line across each box denotes the mean gene ratio.

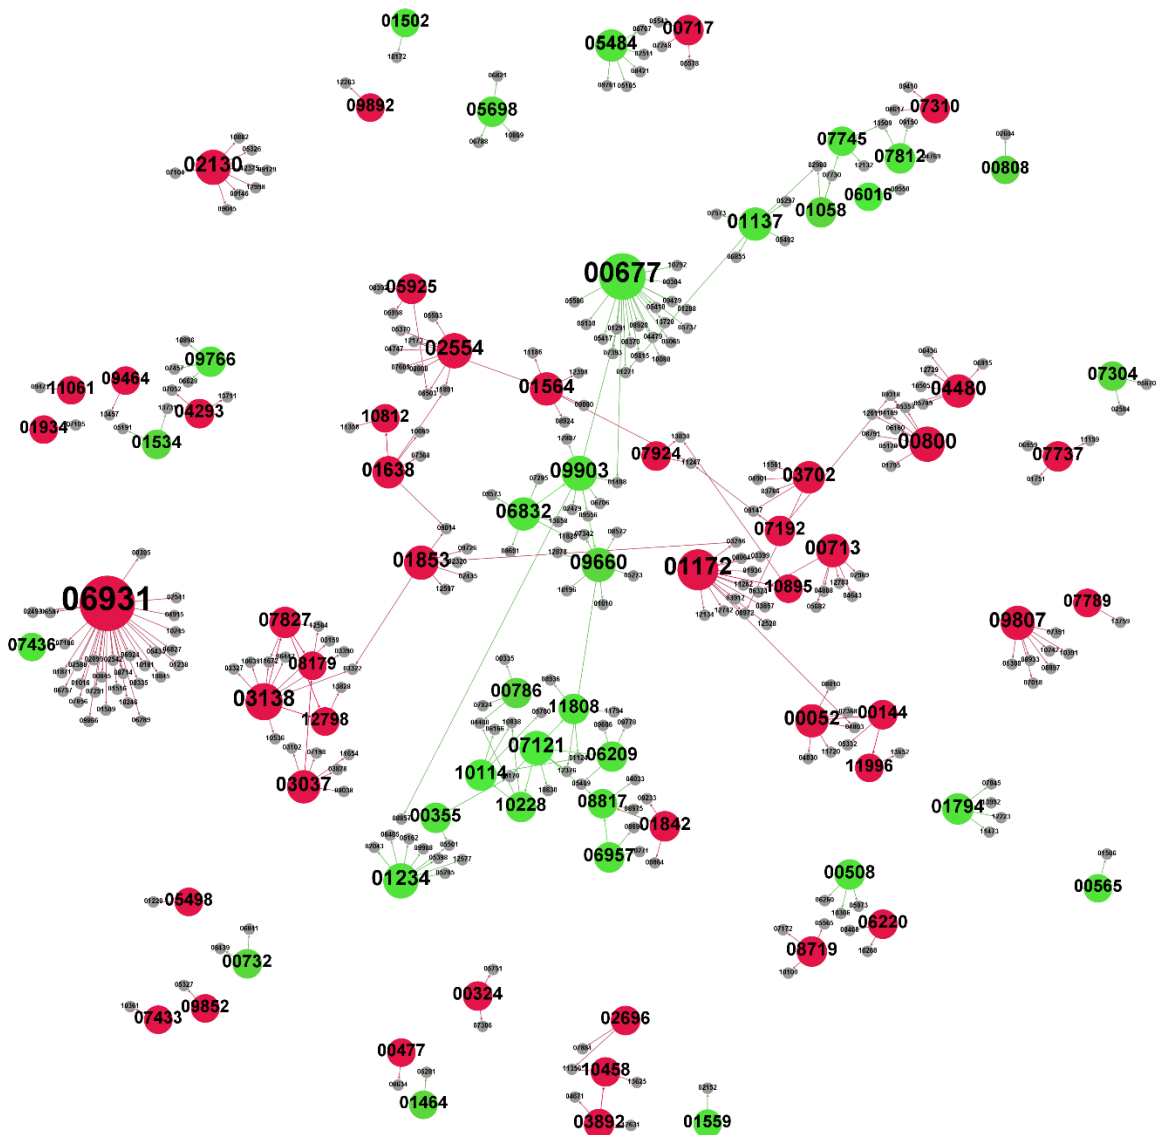

**Fig. S8** Shared networks by the *Fusarium graminearum* GRN and protein–protein interaction network (FPPI). For simplicity, prefixes (FGSG\_) of gene\_ID were omitted. Size of nodes are proportional to their out-degrees (target gene numbers). Red nodes, transcription factor regulators; green nodes, signaling protein regulators; grey nodes, interacting proteins/target genes.

**Table S1** Summary of conditions on which the transcriptomic data are based for *Fusarium graminearum* GRN inference in this study

| Experiment          | Condition ID | Biological conditions                 | No. of biological replicates | Source     |
|---------------------|--------------|---------------------------------------|------------------------------|------------|
| Nutrient starvation | CM*          | Complete medium (CM)                  | 3                            | This study |
| Nutrient starvation | MMC          | Carbon starvation                     | 3                            | This study |
| Nutrient starvation | MMN          | Nitrogen starvation                   | 3                            | This study |
| Gene perturbation   | FAC1         | Adenylyl cyclase mutant growing on CM | 3                            | This study |
| Gene perturbation   | CPK1         | Protein kinase A mutant growing on CM | 3                            | This study |
| Gene perturbation   | Hos2         | <i>Hos2</i> mutant growing on CM      | 3                            | This study |
| Gene perturbation   | HMT1         | <i>HMT1</i> mutant growing on CM      | 3                            | This study |
| Gene perturbation   | Rpd3         | <i>Rpd3</i> mutant growing on CM      | 3                            | This study |
| Gene perturbation   | HP1          | <i>HP1</i> mutant growing on CM       | 3                            | This study |
| FG18                | FG18_H4-H6   | Fgp1 mutant on Putrescine             | 3                            | PLEXdb     |
| FG18                | FG18_H1-H3*  | Wild type on Putrescine               | 3                            | PLEXdb     |
| FG16                | FG16_H1-H3*  | Vegetative hyphae                     | 3                            | PLEXdb     |
| FG16                | FG16_H4-H6   | Wide dikaryotic hyphae                | 3                            | PLEXdb     |
| FG16                | FG16_H7-H9   | Perithecial initials                  | 3                            | PLEXdb     |
| FG16                | FG16_H10-H12 | Young perithecia                      | 3                            | PLEXdb     |
| FG15                | FG15_H1-H3*  | Wheat control                         | 3                            | PLEXdb     |
| FG15                | FG15_H4-H6   | 24 h infection                        | 3                            | PLEXdb     |
| FG15                | FG15_H7-H9   | 48 h infection                        | 3                            | PLEXdb     |
| FG15                | FG15_H10-H12 | 72 h infection                        | 3                            | PLEXdb     |
| FG15                | FG15_H13-H15 | 96 h infection                        | 3                            | PLEXdb     |
| FG15                | FG15_H16-H18 | 144 h infection                       | 3                            | PLEXdb     |
| FG15                | FG15_H19-H21 | 192 h infection                       | 3                            | PLEXdb     |
| FG14                | FG14_H1-H4   | Agmatine                              | 4                            | PLEXdb     |

|      |               |                                         |   |        |
|------|---------------|-----------------------------------------|---|--------|
| FG14 | FG14_H5-H8*   | Glutamine                               | 4 | PLEXdb |
| FG13 | FG13_H1-H3*   | WT PH1 CMC media                        | 3 | PLEXdb |
| FG13 | FG13_H4-H6    | WT PH1 wheat infection                  | 3 | PLEXdb |
| FG13 | FG13_H7-H9    | WT PH1 Secondary metabolism             | 3 | PLEXdb |
| FG13 | FG13_H10-H12  | $\Delta$ FgStuA CMC media               | 3 | PLEXdb |
| FG13 | FG13_H13-H15  | $\Delta$ FgStuA wheat infection         | 3 | PLEXdb |
| FG13 | FG13_H16-H18  | $\Delta$ FgStuA Secondary metabolism    | 3 | PLEXdb |
| FG12 | FG12_H1-H4    | Crown rot infection 2 dpi               | 4 | PLEXdb |
| FG12 | FG12_H5-H8    | Crown rot infection 14 dpi              | 4 | PLEXdb |
| FG12 | FG12_H9-H11   | Crown rot infection 35 dpi              | 3 | PLEXdb |
| FG12 | FG12_H12-H15* | Mycelia cultured                        | 4 | PLEXdb |
| FG11 | FG11_H1-H3*   | Infection PH-1                          | 3 | PLEXdb |
| FG11 | FG11_H4-H6    | Infection PH-1 Tri6 deletion            | 3 | PLEXdb |
| FG11 | FG11_H7-H9    | Infection PH-1 Tri10 deletion           | 3 | PLEXdb |
| FG10 | FG10_H1-H3    | Trochodien 250uM                        | 3 | PLEXdb |
| FG10 | FG10_H4-H6*   | No trochodien                           | 3 | PLEXdb |
| FG7  | FG7_H1-H3*    | Conidia germination 0 h                 | 3 | PLEXdb |
| FG7  | FG7_H4-H6     | Conidia germination 2 h                 | 3 | PLEXdb |
| FG7  | FG7_H7-H9     | Conidia germination 8 h                 | 3 | PLEXdb |
| FG7  | FG7_H10-H12   | Conidia germination 24 h                | 3 | PLEXdb |
| FG6  | FG6_H1-H3*    | Mutant cch1-14 sexual development 0 h   | 3 | PLEXdb |
| FG6  | FG6_H4-H6     | Mutant cch1-14 sexual development 96 h  | 3 | PLEXdb |
| FG6  | FG6_H7-H9     | Mutant cch1-14 sexual development 144 h | 3 | PLEXdb |
| FG5  | FG5_H1-H5*    | PH-1 sexual development 0 h             | 5 | PLEXdb |
| FG5  | FG5_H6-H8     | PH-1 sexual development 24 h            | 3 | PLEXdb |
| FG5  | FG5_H11-H14   | PH-1 sexual development 48 h            | 4 | PLEXdb |
| FG5  | FG5_H16-H18   | PH-1 sexual development 72 h            | 3 | PLEXdb |
| FG5  | FG5_H21-H25   | PH-1 sexual development 96 h            | 5 | PLEXdb |
| FG5  | FG5_H26-H28   | PH-1 sexual development 144 h           | 3 | PLEXdb |
| FG1  | FG1_H1-H3*    | Barley infection water control          | 3 | PLEXdb |
| FG1  | FG1_H4-H6     | Barley infection 24 h                   | 3 | PLEXdb |
| FG1  | FG1_H7-H9     | Barley infection 48 h                   | 3 | PLEXdb |
| FG1  | FG1_H10-H12   | Barley infection 72 h                   | 3 | PLEXdb |
| FG1  | FG1_H13-H15   | Barley infection 96 h                   | 3 | PLEXdb |
| FG1  | FG1_H16-H18   | Barley infection 144 h                  | 3 | PLEXdb |
| FG2  | FG2_H1-H3*    | Complete medium                         | 3 | PLEXdb |
| FG2  | FG2_H4-H6     | Carbon starvation                       | 3 | PLEXdb |
| FG2  | FG2_H7-H9     | Nitrogen starvation                     | 3 | PLEXdb |

\*Reference condition for each experiment. Note that nutrient starvation and gene perturbation experiments share the same reference condition 'CM'. dpi, d post infection.

**Table S4** Summary of signaling proteins identified as inferred regulators in this network

| Regulator  | Annotation                                       | Primary GO terms of regulator                                                                                                                                                                                                                                                                                        | Target genes | GRN_FPPI shared | GO terms overlapped | Total regulator GO terms | Total enriched GO terms of target genes | Function capture ratio ( $R_{co}$ ) |
|------------|--------------------------------------------------|----------------------------------------------------------------------------------------------------------------------------------------------------------------------------------------------------------------------------------------------------------------------------------------------------------------------|--------------|-----------------|---------------------|--------------------------|-----------------------------------------|-------------------------------------|
| FGSG_00355 | RAS GTPase-activating protein SAR1               | Cellular signaling small GTPase; mediated signal transduction, Cell growth / morphogenesis; fungal/microorganismic cell type differentiation                                                                                                                                                                         | 321          | 3               | 17                  | 24                       | 98                                      | 0.7083333333                        |
| FGSG_00508 | calcium P-type ATPase                            | Ion transport; electron transport; vesicular transport (Golgi network, etc.); cellular export and secretion; NIK-I-kappaB/NF-kappaB cascade stress response; homeostasis of cations; cell-cell adhesion; actin cytoskeleton                                                                                          | 300          | 3               | 16                  | 33                       | 114                                     | 0.4848484848                        |
| FGSG_00565 | protein-tyrosine-phosphatase                     | Phosphate metabolism; cell cycle; G2/M transition of mitotic cell cycle; cytokinesis (cell division); septum formation and hydrolysis protein kinase                                                                                                                                                                 | 264          | 1               | 3                   | 25                       | 51                                      | 0.12                                |
| FGSG_00677 | protein kinase ck2 catalytic subunit ck2 alpha-3 | Mitotic cell cycle and cell cycle control; rRNA synthesis; modification by ubiquitin-related proteins; cellular signaling; Wnt signaling pathway; DNA damage response; homeostasis; cell-cell adhesion; cell growth / morphogenesis; cytoskeleton/structural proteins; budding, cell polarity and filament formation | 242          | 14              | 33                  | 48                       | 120                                     | 0.6875                              |
| FGSG_00732 | A.ambisexualis antheridiol steroid receptor      | C-compound and carbohydrate metabolism; cellular signaling                                                                                                                                                                                                                                                           | 288          | 2               | 1                   | 4                        | 101                                     | 0.25                                |
| FGSG_00786 | serine/threonine-protein kinase                  | Phosphate metabolism; respiration; mitotic cell cycle and cell cycle control; meiosis; transcription activation; cellular signaling; Ca <sup>2+</sup> mediated signal                                                                                                                                                | 112          | 3               | 1                   | 33                       | 31                                      | 0.0303030303                        |

|            |                               | transduction                                                                                                                                                                                                                                                                                                                                                     |     |   |   |    |     |              |
|------------|-------------------------------|------------------------------------------------------------------------------------------------------------------------------------------------------------------------------------------------------------------------------------------------------------------------------------------------------------------------------------------------------------------|-----|---|---|----|-----|--------------|
| FGSG_00808 | GTP-binding protein Rab4b     | Purin nucleotide/nucleoside/nucleobase metabolism; phosphate metabolism; protein transport; neurotransmitter transport; vesicular transport (Golgi network, etc.); cellular signaling, G-protein mediated signal transduction; small GTPase mediated signal transduction                                                                                         | 257 | 1 | 2 | 19 | 56  | 0.1052631579 |
| FGSG_01058 | Cell wall biosynthesis kinase | Phosphate metabolism; mitotic cell cycle and cell cycle control; cellular signaling; G-protein coupled receptor signaling pathway; cell growth / morphogenesis; mating (fertilization); cell wall; budding, cell polarity and filament formation                                                                                                                 | 328 | 3 | 0 | 47 | 24  | 0            |
| FGSG_01137 | protein kinase RPK1           | Phosphate metabolism; mitotic cell cycle and cell cycle control; cell cycle checkpoints; meiosis; cytokinesis (cell division)/ septum formation and hydrolysis; spindle pole body/centrosome and microtubule cycle; cellular signaling; cell growth / morphogenesis; cell wall; microtubule cytoskeleton                                                         | 406 | 6 | 6 | 26 | 45  | 0.2307692308 |
| FGSG_01234 | adenylate cyclase             | Metabolism of cyclic and unusual nucleotides; mitotic cell cycle and cell cycle control; meiosis; protein targeting, sorting and translocation; small GTPase mediated signal transduction; cAMP/cGMP mediated signal transduction; FGF-receptor signalling pathway; perception of nutrients and nutritional adaptation; development of asco-basidio- or zygospor | 356 | 8 | 5 | 10 | 119 | 0.5          |
| FGSG_01464 | cell shape control            | Phosphate metabolism; mitotic                                                                                                                                                                                                                                                                                                                                    | 398 | 1 | 6 | 31 | 62  | 0.1935483871 |

|            |                                                                 |                                                                                                                                                                                                                                                                                                             |     |   |    |    |     |              |
|------------|-----------------------------------------------------------------|-------------------------------------------------------------------------------------------------------------------------------------------------------------------------------------------------------------------------------------------------------------------------------------------------------------|-----|---|----|----|-----|--------------|
|            | protein phosphatase ppe1                                        | cell cycle and cell cycle control; G1/S transition of mitotic cell cycle; cellular signaling; protein kinase; NIK-I-kappaB/NF-kappaB cascade; cell wall; actin cytoskeleton; microtubule cytoskeleton; fungal and other eukaryotic cell type differentiation; budding, cell polarity and filament formation |     |   |    |    |     |              |
| FGSG_01502 | ACOB protein                                                    | Modification by ubiquitin-related proteins; proteasomal degradation (ubiquitin/proteasomal pathway); enzyme mediated signal transduction; development of asco- basidio- or zygospor                                                                                                                         | 430 | 1 | 18 | 22 | 128 | 0.8181818182 |
| FGSG_01534 | GTP-binding protein rab2                                        | Protein targeting; sorting and translocation; protein transport ER to Golgi transport; vesicle formation cellular signaling; G-protein mediated signal transduction; small GTPase mediated signal transduction; disease, virulence and defense                                                              | 290 | 2 | 11 | 19 | 106 | 0.5789473684 |
| FGSG_01559 | CDC5 - protein kinase involved in regulation of DNA replication | Nucleotide/nucleoside/nucleobase metabolism; phosphate metabolism; DNA synthesis and replication; DNA repair; mitotic cell cycle and cell cycle control; cell cycle checkpoints; cellular signaling; apoptosis (type I programmed cell death); cytoskeleton/structural proteins                             | 205 | 1 | 0  | 35 | 12  | 0            |
| FGSG_01618 | conserved hypothetical protein                                  | Lipid, fatty acid and isoprenoid metabolism; tetracyclic and pentacyclic triterpenes (cholesterin, steroids and hopanoids) metabolism; cellular signaling                                                                                                                                                   | 255 | 0 | 0  | 6  | 46  | 0            |
| FGSG_01794 | short-chain                                                     | C-compound and carbohydrate                                                                                                                                                                                                                                                                                 | 447 | 4 | 0  | 6  | 20  | 0            |



|            |                              |                                                                                                                                                                                                                                                                                     |        |   |    |    |    |              |
|------------|------------------------------|-------------------------------------------------------------------------------------------------------------------------------------------------------------------------------------------------------------------------------------------------------------------------------------|--------|---|----|----|----|--------------|
|            | alcohol dehydrogenase        | metabolism;<br>sugar, glucoside, polyol and carboxylate catabolism;<br>pentose-phosphate pathway                                                                                                                                                                                    |        |   |    |    |    |              |
| FGSG_01842 | protein serine kinases       | Phosphate metabolism;<br>regulation of C-compound and carbohydrate metabolism;<br>cellular signaling;<br>MAPKKK cascade;<br>transmembrane receptor protein serine/threonine kinase signalling pathways;<br>apoptosis (type I programmed cell death);<br>microtubule cytoskeleton    | 286    | 3 | 13 | 30 | 79 | 0.4333333333 |
| FGSG_02349 | tyrosine-tRNA ligase         | Translation;<br>aminoacyl-tRNA-synthetases;<br>interleukine receptor signalling pathway;<br>cell motility;<br>apoptosis (type I programmed cell death)                                                                                                                              | 416    | 0 | 0  | 19 | 16 | 0            |
| FGSG_02751 | aldehyde reductase           | Sugar, glucoside, polyol and carboxylate metabolism;<br>polyphosphoinositol mediated signal transduction;<br>osmosensing and response;<br>eukaryotic plasma membrane                                                                                                                | 330    | 0 | 0  | 17 | 16 | 0            |
| FGSG_04982 | protein-tyrosine phosphatase | Phosphate metabolism;<br>mitotic cell cycle and cell cycle control;<br>cellular signaling;<br>polyphosphoinositol mediated signal transduction;<br>cell growth / morphogenesis                                                                                                      | 195    | 0 | 4  | 16 | 67 | 0.25         |
| FGSG_05060 | phospholipase C              | Lipid, fatty acid and isoprenoid metabolism;<br>phospholipid metabolism;<br>cation transport (H <sup>+</sup> , Na <sup>+</sup> , K <sup>+</sup> , Ca <sup>2+</sup> , NH <sub>4</sub> <sup>+</sup> , etc.);<br>cellular signaling;<br>second messenger mediated signal transduction; | 448 () | 0 | 3  | 16 | 35 | 0.1875       |

|            |                                                                            |                                                                                                                                                                                                                                                       |     |   |    |    |    |              |
|------------|----------------------------------------------------------------------------|-------------------------------------------------------------------------------------------------------------------------------------------------------------------------------------------------------------------------------------------------------|-----|---|----|----|----|--------------|
|            |                                                                            | fatty acid derivatives mediated signal transduction;<br>polyphosphoinositol mediated signal transduction                                                                                                                                              |     |   |    |    |    |              |
| FGSG_05698 | WD40-repeat protein (notchless protein)                                    | rRNA processing;<br>ribosome biogenesis;<br>translation;<br>assembly of protein complexes;<br>nuclear transport;<br>Notch-receptor signalling pathway;<br>fungal and other eukaryotic cell type differentiation                                       | 233 | 3 | 8  | 23 | 47 | 0.347826087  |
| FGSG_06016 | dock180 protein                                                            | Cellular signaling;<br>small GTPase mediated signal transduction;<br>chemotaxis;<br>eukaryotic plasma membrane;<br>cytoskeleton/structural proteins;<br>actin cytoskeleton                                                                            | 301 | 1 | 14 | 24 | 86 | 0.5833333333 |
| FGSG_06209 | ( SEC4-like Rab/GTPase )                                                   | Vesicular transport (Golgi network, etc.);<br>cellular signaling;<br>G-protein mediated signal transduction                                                                                                                                           | 228 | 3 | 2  | 7  | 88 | 0.2857142857 |
| FGSG_06832 | Prk1p, and serine/threonine protein kinase homolog from <i>A. thaliana</i> | Phosphate metabolism;<br>assembly of protein complexes;<br>endocytosis;<br>cellular signaling;<br>serine/threonine kinase;<br>actin cytoskeleton                                                                                                      | 313 | 6 | 21 | 26 | 89 | 0.8076923077 |
| FGSG_07121 | serine/threonine-protein kinase Chk2                                       | Phosphate metabolism;<br>DNA repair;<br>cell cycle arrest;<br>cell cycle checkpoints;<br>cellular signaling;<br>protein kinase;<br>Ca <sup>2+</sup> mediated signal transduction;<br>DNA damage response;<br>apoptosis (type I programmed cell death) | 397 | 7 | 4  | 36 | 62 | 0.1111111111 |
| FGSG_07304 | conserved                                                                  | Cell cycle;                                                                                                                                                                                                                                           | 379 | 2 | 3  | 12 | 98 | 0.25         |

|            |                                                                    |                                                                                                                                                                                                                                                                                                                                                                                                                                                                                            |     |   |    |    |     |              |
|------------|--------------------------------------------------------------------|--------------------------------------------------------------------------------------------------------------------------------------------------------------------------------------------------------------------------------------------------------------------------------------------------------------------------------------------------------------------------------------------------------------------------------------------------------------------------------------------|-----|---|----|----|-----|--------------|
|            | hypothetical protein                                               | cellular signaling;<br>JNK cascade;<br>NIK-I-kappaB/NF-kappaB cascade;<br>small GTPase mediated signal transduction                                                                                                                                                                                                                                                                                                                                                                        |     |   |    |    |     |              |
| FGSG_07433 | hypothetical protein similar to RhoGAP and Fes/CIP4 domain protein | Signal transduction;<br>small GTPase mediated signal transduction;<br>establishment or maintenance of actin cytoskeleton polarity;<br>intracellular signal transduction                                                                                                                                                                                                                                                                                                                    | 113 | 1 | 10 | 14 | 112 | 0.7142857143 |
| FGSG_07436 |                                                                    | Translation;<br>aminoacyl-tRNA-synthetases;<br>interleukine receptor signalling pathway;<br>cell motility;<br>apoptosis (type I programmed cell death)                                                                                                                                                                                                                                                                                                                                     | 344 | 1 | 11 | 19 | 130 | 0.5789473684 |
| FGSG_07812 | GDP/GTP exchange factor for Gsp1p/Gsp2p                            | Cell cycle;<br>Cell division                                                                                                                                                                                                                                                                                                                                                                                                                                                               | 505 | 3 | 1  | 1  | 33  | 1            |
| FGSG_08173 | RAS superfamily KREV-1                                             | Mitotic cell cycle and cell cycle control;<br>cell cycle checkpoints;<br>cytokinesis (cell division) /septum formation and hydrolysis;<br>rRNA processing;<br>tRNA processing;<br>mRNA processing (splicing, 5', 3'-end processing);<br>ribosome biogenesis;<br>protein modification;<br>modification by ubiquitination, deubiquitination;<br>proteasomal degradation (ubiquitin/proteasomal pathway);<br>protein transport;<br>RNA transport;<br>nuclear transport;<br>cellular signaling | 113 | 0 | 25 | 37 | 77  | 0.6756756757 |
| FGSG_08817 | protein kinase C-like                                              | Purin nucleotide/nucleoside/nucleobase metabolism;                                                                                                                                                                                                                                                                                                                                                                                                                                         | 316 | 2 | 11 | 31 | 100 | 0.3548387097 |

|            |                                                       |                                                                                                                                                                                                                                                                                                                                                                                                                                            |     |   |    |    |     |              |
|------------|-------------------------------------------------------|--------------------------------------------------------------------------------------------------------------------------------------------------------------------------------------------------------------------------------------------------------------------------------------------------------------------------------------------------------------------------------------------------------------------------------------------|-----|---|----|----|-----|--------------|
|            |                                                       | <p>phosphate metabolism;<br/>transfer of activated C-1 groups;<br/>cell cycle;<br/>mitotic cell cycle and cell cycle control;<br/>G-protein mediated signal transduction;<br/>small GTPase mediated signal transduction;<br/>chemotaxis;<br/>cell growth / morphogenesis;<br/>cytoskeleton/structural proteins;<br/>budding, cell polarity and filament formation</p>                                                                      |     |   |    |    |     |              |
| FGSG_09660 | putative RNA helicase involved in ribosome biogenesis | <p>C-compound and carbohydrate metabolism;<br/>lipid, fatty acid and isoprenoid metabolism;<br/>isoprenoid metabolism;<br/>metabolism of vitamins, cofactors, and prosthetic groups;<br/>glycolysis and gluconeogenesis;<br/>electron transport;<br/>electromagnetic waves stress response (e.g. UV, X-ray);<br/>detoxification by degradation</p>                                                                                         | 438 | 7 | 22 | 44 | 110 | 0.5          |
| FGSG_09766 | MAP kinase kinase                                     | <p>Phosphate metabolism;<br/>DNA topology;<br/>DNA repair;<br/>DNA recombination;<br/>DNA conformation modification (e.g. chromatin);<br/>RNA synthesis;<br/>transcriptional control;<br/>transcription repression;<br/>RNA processing;<br/>rRNA processing;<br/>tRNA processing;<br/>mRNA processing (splicing, 5', 3'-end processing);<br/>splicing;<br/>control of mRNA stability;<br/>ribosome biogenesis;<br/>ribosomal proteins;</p> | 432 | 3 | 5  | 44 | 59  | 0.1136363636 |

|            |                   |                                                                                                                                                                                                                                                                                                                                                                                                                                                                                                                                                                                                                                                                                                                                                       |     |   |    |    |     |              |
|------------|-------------------|-------------------------------------------------------------------------------------------------------------------------------------------------------------------------------------------------------------------------------------------------------------------------------------------------------------------------------------------------------------------------------------------------------------------------------------------------------------------------------------------------------------------------------------------------------------------------------------------------------------------------------------------------------------------------------------------------------------------------------------------------------|-----|---|----|----|-----|--------------|
|            |                   | hormone mediated signal transduction;<br>organization of chromosome structure                                                                                                                                                                                                                                                                                                                                                                                                                                                                                                                                                                                                                                                                         |     |   |    |    |     |              |
| FGSG_09903 | MAP kinase kinase | Phosphate metabolism;<br>MAPKKK cascade;<br>serine/threonine kinase;<br>transmembrane signal transduction;<br>perception of nutrients and nutritional adaptation;<br>budding, cell polarity and filament formation                                                                                                                                                                                                                                                                                                                                                                                                                                                                                                                                    | 247 | 8 | 24 | 29 | 146 | 0.8275862069 |
| FGSG_10114 | RAS-2 protein     | Purin nucleotide/nucleoside/nucleobase metabolism;<br>regulation of nucleotide/nucleoside/nucleobase metabolism;<br>phosphate metabolism;<br>transfer of activated C-1 groups;<br>regulation of C-compound and carbohydrate metabolism;<br>cell cycle;<br>mitotic cell cycle and cell cycle control;<br>cytokinesis (cell division) /septum formation and hydrolysis;<br>protein kinase;<br>small GTPase mediated signal transduction;<br>cAMP/cGMP mediated signal transduction;<br>stress response;<br>perception of nutrients and nutritional adaptation;<br>directional cell growth (morphogenesis);<br>cell death;<br>cell aging;<br>cell wall;<br>fungal and other eukaryotic cell type differentiation;<br>budding, cell polarity and filament | 557 | 4 | 24 | 46 | 116 | 0.5217391304 |

|            |                        |                                                                                                                                                                               |     |   |    |    |     |      |
|------------|------------------------|-------------------------------------------------------------------------------------------------------------------------------------------------------------------------------|-----|---|----|----|-----|------|
|            |                        | formation;<br>hyphae formation;<br>development of asco- basidio- or<br>zygospore                                                                                              |     |   |    |    |     |      |
| FGSG_10807 | NADPH oxidase 1        | Electron transport;<br>cellular signaling;<br>superoxide metabolism;<br>homeostasis of cations;<br>gravity perception and response;<br>temperature perception and<br>response | 273 | 0 | 11 | 25 | 79  | 0.44 |
| FGSG_11469 | GTP-binding<br>protein | Cellular signaling                                                                                                                                                            | 231 | 0 | 3  | 5  | 107 | 0.6  |

## References

- Son H, Seo YS, Min K, Park AR, Lee J, Jin JM, Lin Y, Cao P, Hong SY, Kim EK *et al.* 2011.** A phenome-based functional analysis of transcription factors in the cereal head blight fungus, *Fusarium graminearum*. *PLoS Pathog* **7**: e1002310.
- Wang C, Zhang S, Hou R, Zhao Z, Zheng Q, Xu Q, Zheng D, Wang G, Liu H, Gao X *et al.* 2011.** Functional analysis of the kinome of the wheat scab fungus *Fusarium graminearum*. *PLoS Pathog* **7**: e1002460.
- Winnenburg R, Baldwin TK, Urban M, Rawlings C, Köhler J, Hammond-Kosack KE. 2006.** PHI-base: a new database for pathogen host interactions. *Nucleic Acids Research* **34**: D459–D464.
